# Supplementary material
Source: publisher site journal article supplement (https://www.dovepress.com/article/551653)
Supplement: Supplementary file 1 [file 551653%20Revised%20%252509Table%20S1.docx]

Table S1. Questionnaire on gastrointestinal function recovery after elective cesarean section for medical staff (5-point likert scale)

| **Evaluation direction** | **Questionnaire question content** | **score** |
| --- | --- | --- |
| Knowledge mastery and guideline compliance | 1. I am familiar with the core recommendations for gastrointestinal function recovery in the "Enhanced Recovery After Surgery (ERAS) Obstetric Guidelines." |  |
| 1. I can accurately describe the clinical diagnostic criteria for delayed first postoperative flatus/defecation (>24h). |  |
| 1. I understand the mechanisms of action and contraindications of Traditional Chinese Medicine interventions such as acupoint massage and abdominal massage. |  |
| 1. I have mastered the operational standards for postoperative dynamic bowel sound monitoring. |  |
| 1. Our department has established a standardized nursing pathway (SOP) for postoperative gastrointestinal function recovery. |  |
| Current status of clinical practice | 1. I routinely use quantitative tools (such as VAS scores) to assess the degree of postoperative abdominal distension. |  |
| 1. I will communicate with the physician based on the patient's BMI and surgical duration to coordinate the postoperative activity plan. |  |
| 1. I can provide personalized postoperative dietary plans for different patients. |  |
| 1. Our team conducts regular multidisciplinary discussions (MDT) on postoperative gastrointestinal dysfunction cases. |  |
| 1. I have participated in a nursing quality improvement project related to postoperative gastrointestinal function recovery. |  |
| Multidisciplinary collaboration and resource integration | 1. The Department of Nutrition will provide individualized dietary plans based on postoperative gastrointestinal function assessment results. |  |
| 1. The Rehabilitation Department is capable of providing customized activity guidance for high-risk patients (such as those with BMI≥30). |  |
| 1. The Department of Traditional Chinese Medicine and the Department of Obstetrics have established a standardized procedure for postoperative integrated Chinese and Western medicine intervention. |  |
| 1. I am capable of innovatively utilizing intelligent devices to observe postoperative patient activities. |  |
| Training and Technology Application | 1. I have received continuing education training on postoperative gastrointestinal function recovery within the past year. |  |
| 1. I am proficient in using electronic medical record systems to record/analyze gastrointestinal function recovery data. |  |
| 1. I can communicate seamlessly with multidisciplinary healthcare professionals. |  |
| 1. I will adopt multiple nursing measures to promote the recovery of patients' gastrointestinal function. |  |
| Obstacles and Improvement Needs | 1. The current allocation of human resources is sufficient to support the demand for refined management of postoperative gastrointestinal function. |  |
| 1. I urgently need more evidence-based tools (such as decision flowcharts) to optimize clinical practice. |  |

Instructions for completion: 1 = Completely inconsistent/Never implemented, 2 = Relatively inconsistent/Rarely implemented, 3 = Moderate/Occasionally implemented, 4 = Relatively consistent/Frequently implemented, 5 = Completely consistent/Routinely implemented
